# Supplementary material for: The Dynamics of Supply and Demand in mRNA Translation
Source: PLOS journal article supplement (doi:10.1371/journal.pcbi.1002203), 2011-10-13
Supplement: S3 (10.1371/journal.pcbi.1002203.s003) [file journal.pcbi.1002203.s003]

301 Moved Permanently

# Moved Permanently

The document has moved here.

---

Apache Server at www.ploscompbiol.org Port 80
